# Supplementary material for: Long‐lived hypopituitary Ames dwarf mice are resistant to the detrimental effects of high‐fat diet on metabolic function and energy expenditure
Source: PubMed Central journal article supplement (PMC4854906; doi:10.1111/acel.12467), 2016-03-17

# Supplement figure 1

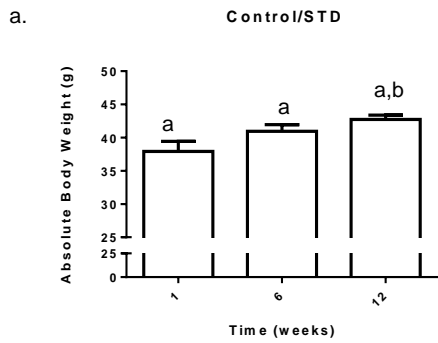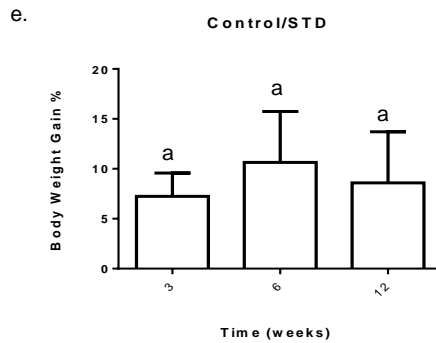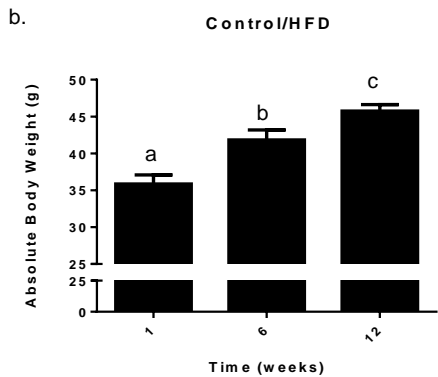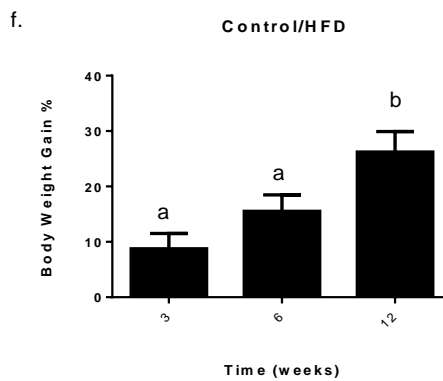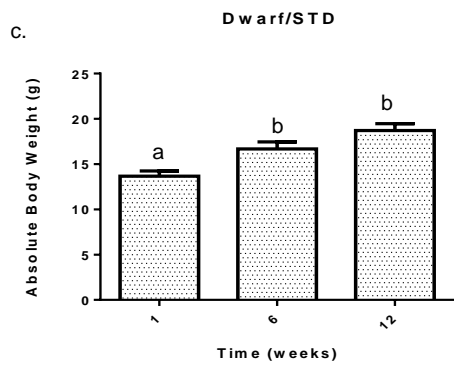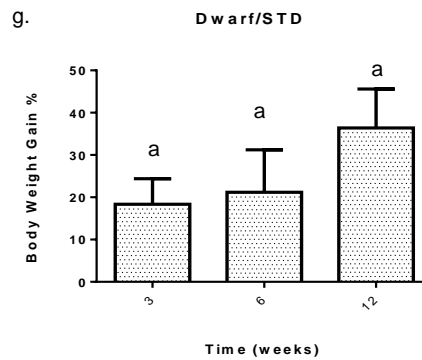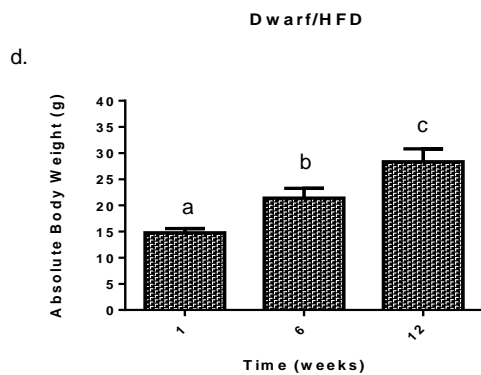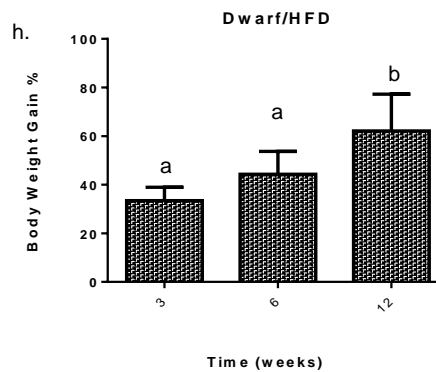

# Supplement figure 2

a. **Subcutaneous Adipose Tissue**

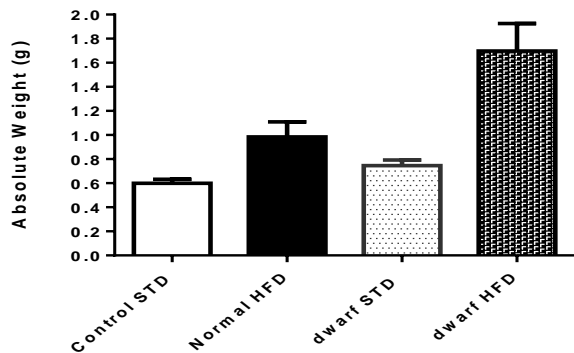

b. **Epididymal Adipose Tissue**

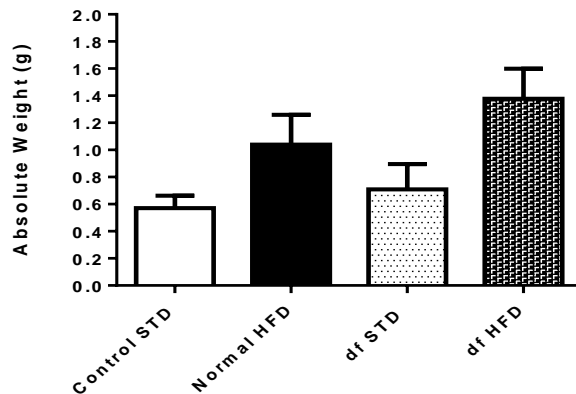

c. **Retroperitoneal Adipose Tissue**

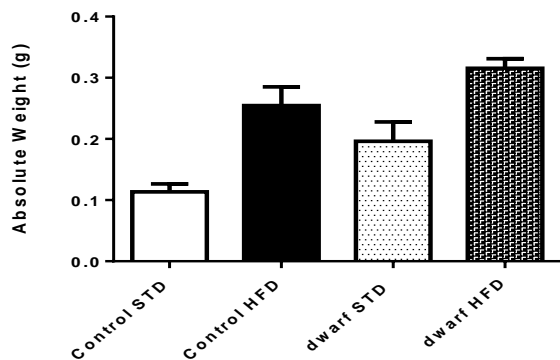

d. **Brown Adipose Tissue**

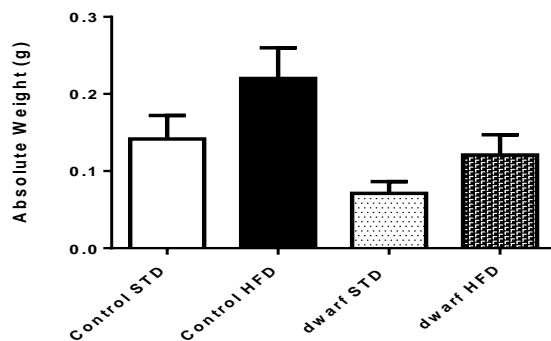

# Supplement figure 3

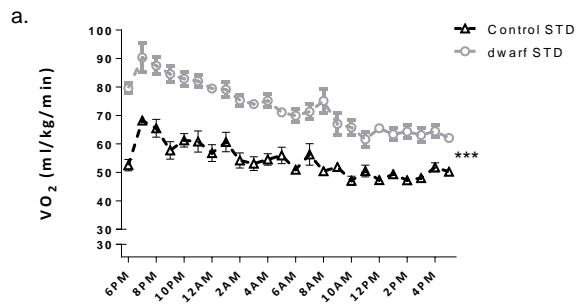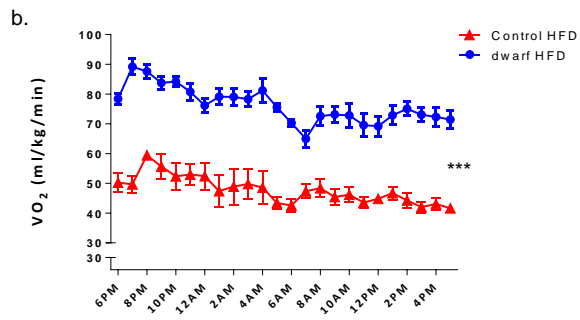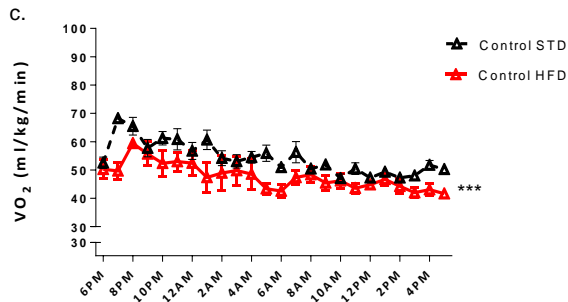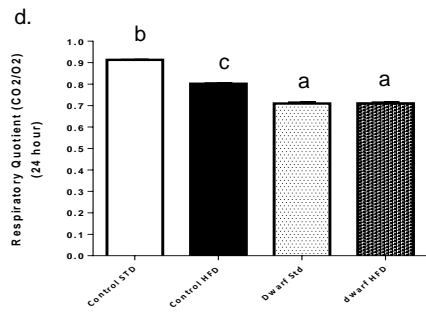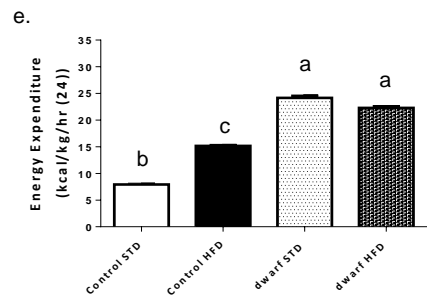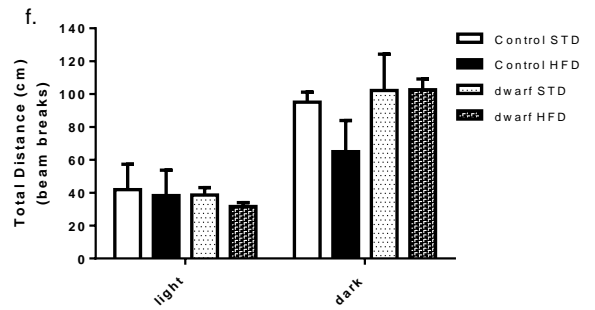

Supplement: ACEL-15-509-s001.pdf [file ACEL-15-509-s001.pdf]
